# Supplementary material for: Splanchnic Spillover of Extracellular Lipase–Generated Fatty Acids in Overweight and Obese Humans
Source: Oxford University Press journal article supplement (doi:10.2337/db07-0812), 2007-09-20
Supplement: db070812onlineappendix.doc [file db070812onlineappendix.doc]

**APPENDIX**

**Detailed Calculations**

*Systemic kinetics*

1) Systemic [3H] oleate Rate of appearance (Ra):

[3H]SAA

[14C]SAA

[3H] Ra (dpm/min) = [14C] infusion rate 

where SA = specific activity. (alternatively, 13C oleate infusion rate and 13C oleate atoms percent enrichment, or APE, can be used.)

2) Systemic Fractional Spillover

[3H] oleate Ra (dpm/min) [3H] triolein infusion rate (dpm/min)

Systemic fractional spillover (%) =  100

assuming that [3H] oleate Ra is equal to the [3H]triolein infusion rate if there were no local uptake of [3H]oleate.

*Net splanchnic kinetics*

Net splanchnic spillover was calculated from the following formulae, which do not take the portal venous circulation into consideration. These formulae use arterial and hepatic venous values, analogous to determination of spillover in the human forearm (1):

3) Net fractional extraction of oleate for the splanchnic bed was calculated from the formula

FES (%) = (1 – ) 100

[14C]SAHCH

[14C]SAACA

where C is concentration, and A and H refer to arterial and hepatic venous plasma, respectively.

4) The net rate of [3H] oleate release in the splanchnic bed that would be expected if there were no local uptake of triglyceride-derived oleate (ie, if fractional spillover were 100%) was calculated from the uptake of 3H triglyceride from arterial plasma according to the formula:

ERS (dpm min-1) = ([3H TG]A – [3H TG]H)  (PFP + PFA)

where [3H TG] equals the concentration of 3H triglyceride in dpmmL-1, PFP equals portal venous plasma flow and PFA equals hepatic artery plasma flow

5) The actual net release of triglyceride-derived [3H] oleate in the splanchnic bed was calculated from the formula:

ARS (dpm min-1) = **(**([3H] SAH CH) – ([3H] SAACA (1-FES))**)**  (PFP + PFA)

where the expression ([3H] SAACA  **(**1**-**FES)) equals the predicted concentration of 3H oleate in hepatic venous plasma if fractional spillover of triglyceride-derived oleate is zero

*Nonhepatic splanchnic tissue kinetics*

6) Fractional extraction of oleate for nonhepatic splanchnic tissues was calculated from the formula:

[14C]SAPCP

[14C]SAACA

FENH (%) = (1 – ) 100

7) The rate of [3H] oleate release in nonhepatic splanchnic tissues that would be expected if there were no local uptake of triglyceride-derived oleate (ie, if fractional spillover were 100%) was calculated from the uptake of 3H triglyceride from arterial plasma according to the formula:

ERNH (dpm min-1) = ([3H TG]A – [3H TG]P)  PFP

8) The actual release of triglyceride-derived [3H] oleate in nonhepatic splanchnic tissues was calculated from the formula:

ARNH (dpm min-1) = **(**([3H] SAPCP) – ([3H] SAACA (1-FENH))**)** PFP

*Hepatic kinetics*

Hepatic spillover was calculated from the following formulae, which take into account that organ’s dual blood supply:

9) Fractional extraction of oleate for the liver was calculated from the formula:

[14C]SAHCH   (PFA  + PFP)

[14C]SAA  CA  PFA  + [14C]SAP  CP  PFP

FEH (%) = **(** 1 – **)** 100

10) The rate of [3H] oleate release in the liver that would be expected if there were no local uptake of LPL-generated oleate was calculated as follows:

ERH (dpm min-1) = **(**[3H TG]A  PFA ) + ([3H TG]P PFP )**)** – **(**[3H TG]H  (PFA + PFP)**)**

11) The actual release of triglyceride-derived [3H] oleate in the liver was calculated from the formula:

ARH (dpm min-1) =

([3H] SAH CH)(PFA + PFP) – **(** ([3H] SAACA  PFA **+** [3H]SAP  CP  PFP) (1-FEH) **)**

*Spillover calculations*

12) Fractional spillover of [3H] oleate for the splanchnic bed, nonhepatic tissues, and the liver was calculated by the formula:

AR

ER

Fractional Spillover (%) = 100

using the respective AR and ER values for the 3 tissue beds

13) “True” fractional spillover for the splanchnic bed was calculated from nonhepatic splanchnic and hepatic spillover, the contribution from each tissue bed weighted for the relative distribution of spillover in the two tissue beds:

True spillover =  Spillover NH +  Spillover H

ARNH

ARNH + ARH

ARH

ARNH + ARH

Nonsplanchnic spillover was calculated from the difference between systemic and true splanchnic 3H TG uptake and 3H oleate appearance. The contribution of nonhepatic splanchnic and hepatic tissues to systemic 3H triglyceride disappearance was calculated by dividing 3H triglyceride uptake (equal to ERNH and ERH, respectively in formulae 7 and 10 above) by the 3H triolein infusion rate. Since whole plasma triglyceride radioactivity was measured, an estimate of the contribution of hepatic extraction of labeled emulsion remnants to total hepatic extraction of labeled triglyceride was made. Based on the half life of large emulsion particles and remnants, this contribution was estimated to be 0.8%. A detailed description of this calculation is provided elsewhere (2).

REFERENCES

1. Miles J, Park Y, Walewicz D, Russell-Lopez C, Windsor S, Isley W, Coppack S, Harris W: Systemic and forearm triglyceride metabolism: fate of lipoprotein lipase-generated glycerol and free fatty acids. *Diabetes* 53:521-527, 2004

2. Nelson RH, Edgerton DS, Basu R, Roesner JC, Cherrington AD, Miles JM: Triglyceride uptake and lipoprotein lipase - generated fatty acid spillover in the splanchnic bed of dogs. *Diabetes* 56:1850-1855, 2007
